# Supplementary material for: Regulation of Chitin-Dependent Growth and Natural Competence in Vibrio parahaemolyticus
Source: PubMed Central journal article supplement (PMC7564644; doi:10.3390/microorganisms8091303), 2020-08-26
Supplement: microorganisms-08-01303-s001.pdf [file microorganisms-08-01303-s001.pdf]

Manuscript No.: microorganisms-889985

**Regulation of Chitin Dependent Growth and Natural Competence in *Vibrio parahaemolyticus***

ANUSUYA DEBNATH<sup>1\*</sup>, TAMAKI MIZUNO<sup>1</sup> and SHIN-ICHI MIYOSHI<sup>1</sup>

<sup>1</sup>Okayama University, Okayama, Japan

**\*Corresponding author**

Anusuya Debnath

Graduate School of Medicine, Dentistry and Pharmaceutical Sciences

Okayama University

1-1-1, Tsushimanaka, Kita-ku

Okayama 700-8530

Phone: +81-86-251-7959

e-mail: [anusuyadebnath@yahoo.co.in](mailto:anusuyadebnath@yahoo.co.in), [pu0139jq@okayama-u.ac.jp](mailto:pu0139jq@okayama-u.ac.jp)

## Supplementary Figures

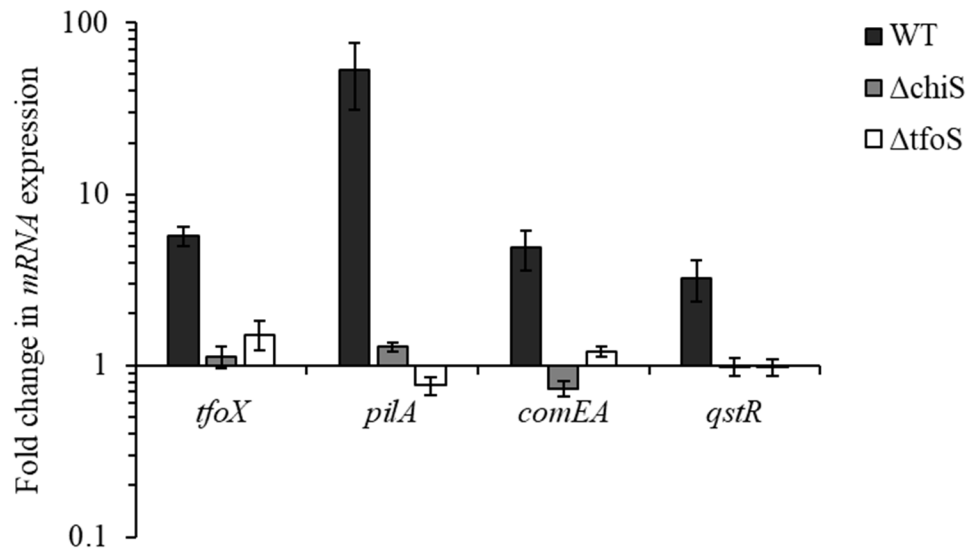

**Figure S1.** The relative expression of competence genes *tfoX*, *pilA*, *comEA* and *qstR* at mRNA level was checked for WT,  $\Delta\text{chiS}$  and  $\Delta\text{tfoS}$  mutant in the presence of chitin. *pvsA* was used as an internal control. Each bar indicates the mean  $\pm$  SE of three independent experiments.

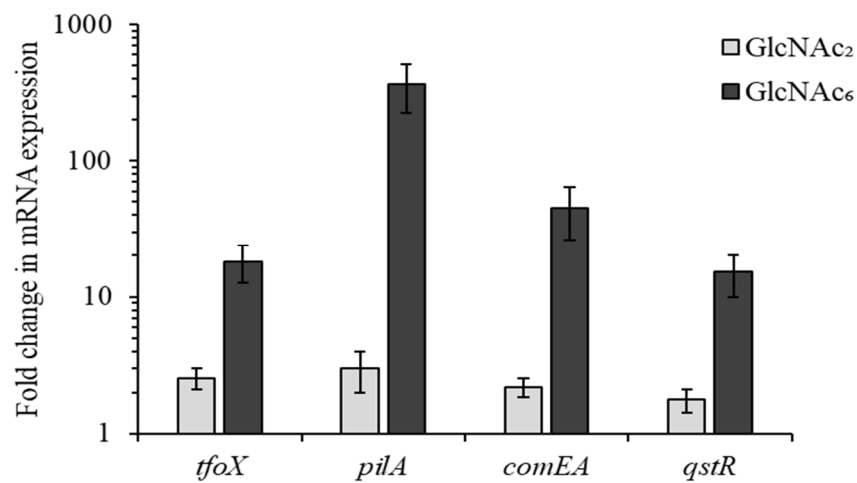

**Figure S2.** The relative mRNA expression of competence genes *tfoX*, *pilA*, *comEA* and *qstR* was compared in the presence of GlcNAc<sub>2</sub> and GlcNAc<sub>6</sub> in wild type strain. *pvsA* was used as an internal control. Each bar indicates the mean  $\pm$  SE of three independent experiments.
